# Supplementary material
Source: PubMed Central journal article supplement (PMC3868497)
Supplement: NIHMS532071-supplement-1.pdf [file NIHMS532071-supplement-1.pdf]

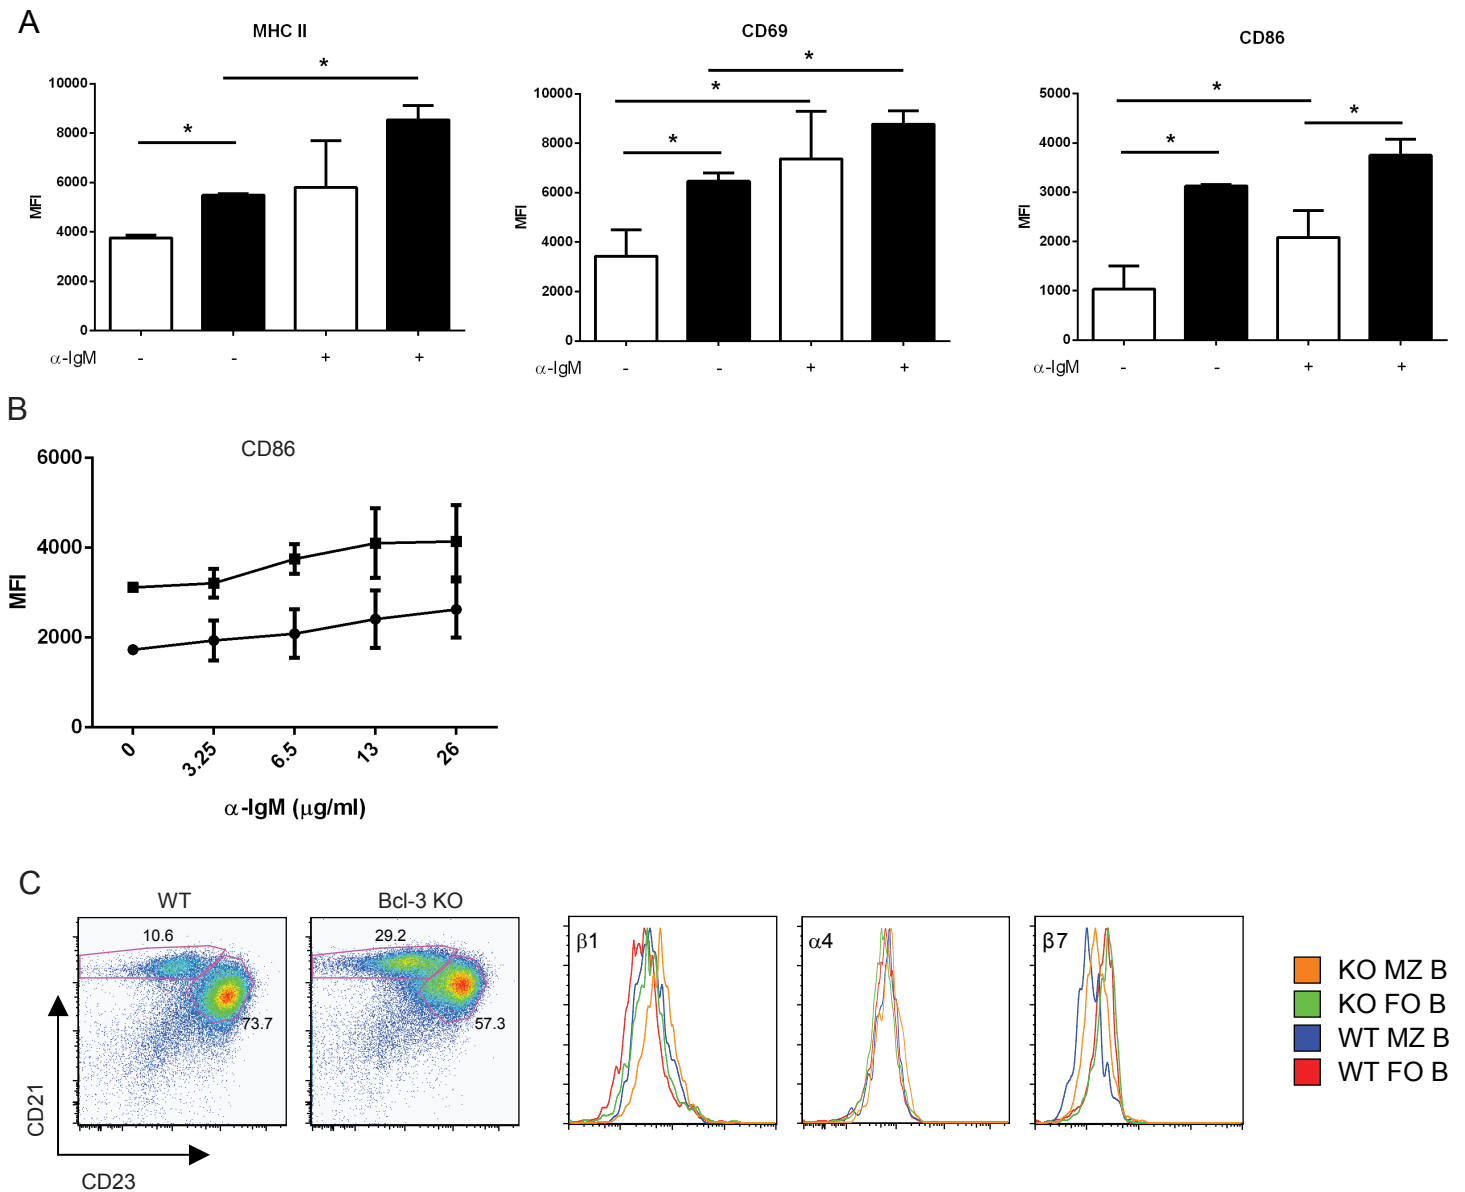

Expression of co-stimulatory molecules and integrins on *Bcl-3*<sup>-/-</sup> B cells.

(A, B) FO B cells (CD43<sup>-</sup>CD23<sup>+</sup>) were obtained by MACS bead separation. Cells were stimulated for 24 h with (A) anti-IgM (6.25 µg/ml) or (B) titrated amounts of anti-IgM as indicated, or not stimulated (NS), and analyzed by flow cytometry for expression of surface markers as indicated. Data are shown as the mean ± SD for n=3 independently analyzed mice per group; similar results were obtained in a second separate experiment (C) Splenocytes from 6-week-old WT and KO mice were stained for B220, CD23, CD21 and integrin chains as indicated, and analyzed by flow cytometry. After gating on MZ B cells (B220<sup>+</sup>CD23<sup>-/lo</sup>CD21<sup>hi</sup>) or FO B cells (B220<sup>+</sup>CD23<sup>+</sup>CD21<sup>+</sup>) (shown in left panel), expression of the various integrin chains was analyzed as shown in the right panels. Data are representative of 2 separate experiments with n= 3 independently analyzed mice per group.
