# Supplementary material
Source: PubMed Central journal article supplement (PMC3868497)
Supplement: NIHMS532071-supplement-2.pdf [file NIHMS532071-supplement-2.pdf]

Supplemental Figure S2

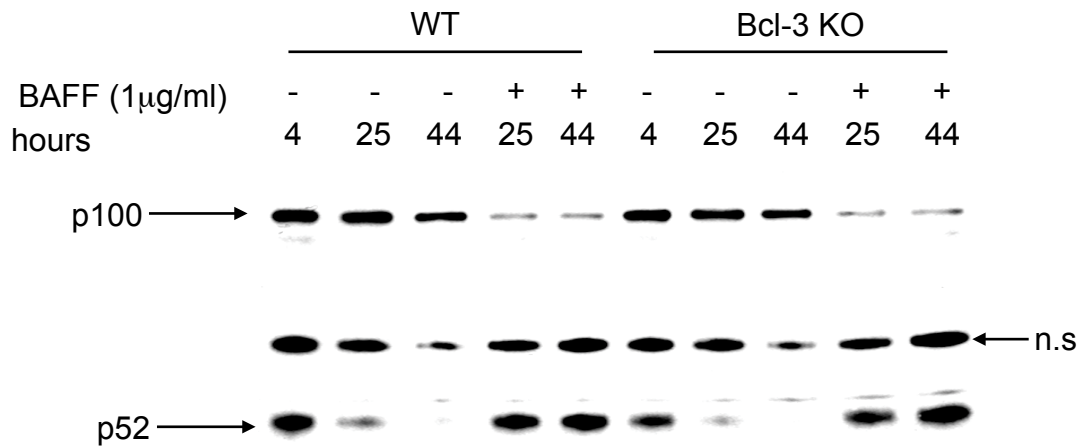

BAFF-induced processing of NF- $\kappa$ B2 p100 to p52 in Bcl-3<sup>-/-</sup> B cells.

B cells isolated from WT and KO mice were stimulated with BAFF (500 ng/ml) (Peprotech) for the times indicated. Western blotting was performed to examine processing of p100 to p52. Freshly isolated cells contain processed p52 due to exposure to BAFF *in vivo*; most of the *in vivo* processed p52 disappears after an overnight incubation and will reappear only upon addition of BAFF to the culture. A second independent experiment yielded similar results.
